# Supplementary material for: Generation of the Chondroprotective Proteomes by Activating PI3K and TNFα Signaling
Source: MDPI journal article supplement (doi:10.3390/cancers14133039), 2022-06-21
Supplement: s1 [file s1]

## Supplementary Materials

# Generation of the Chondroprotective Proteomes by Activating PI3K and TNF $\alpha$ Signaling

Xun Sun, Ke-Xin Li, Marxa L. Figueiredo, Chien-Chi Lin, Bai-Yan Li and Hiroki Yokota

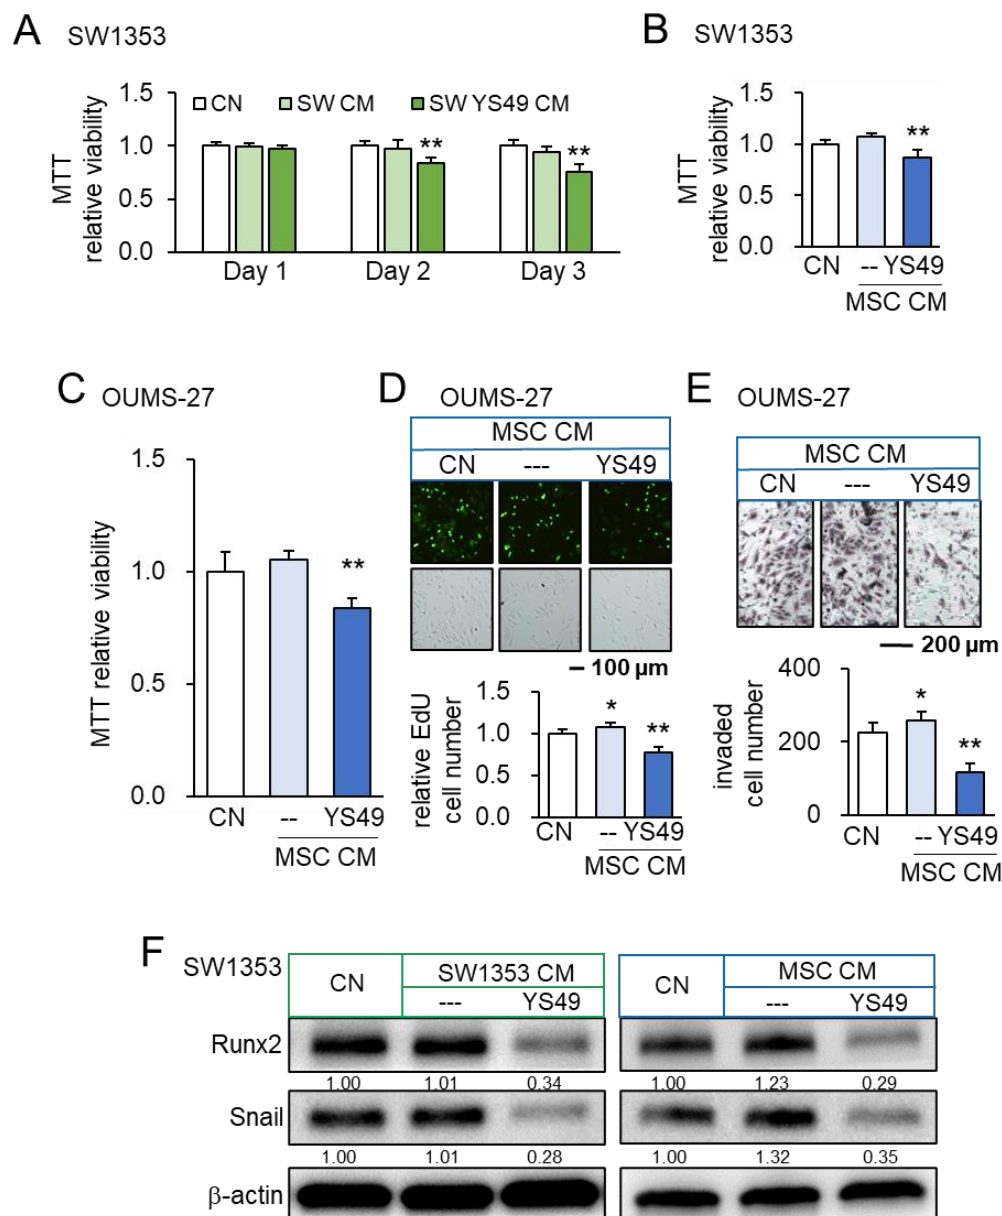

**Figure S1.** Anti-tumorigenic effects of YS49-treated SW1353 and MSCs-derived CM. CN = control, and CM = conditioned medium. The single and double asterisks indicate  $p < 0.05$  and  $0.01$ , respectively. (A–B) Reduction in MTT-based viability of SW1353 chondrosarcoma cells by YS49-activated SW1353 and MSC-derived CM. (C–E) Reduction in MTT-based viability, EdU-based proliferation, and transwell invasion of OUMS-27 chondrosarcoma cells by YS49-treated MSC-derived CM. (F) Downregulation of Runx2 and Snail in SW1353 cells by YS49-treated chondrosarcoma/MSC-derived CM. Full Western blot images are available in Figure S8.

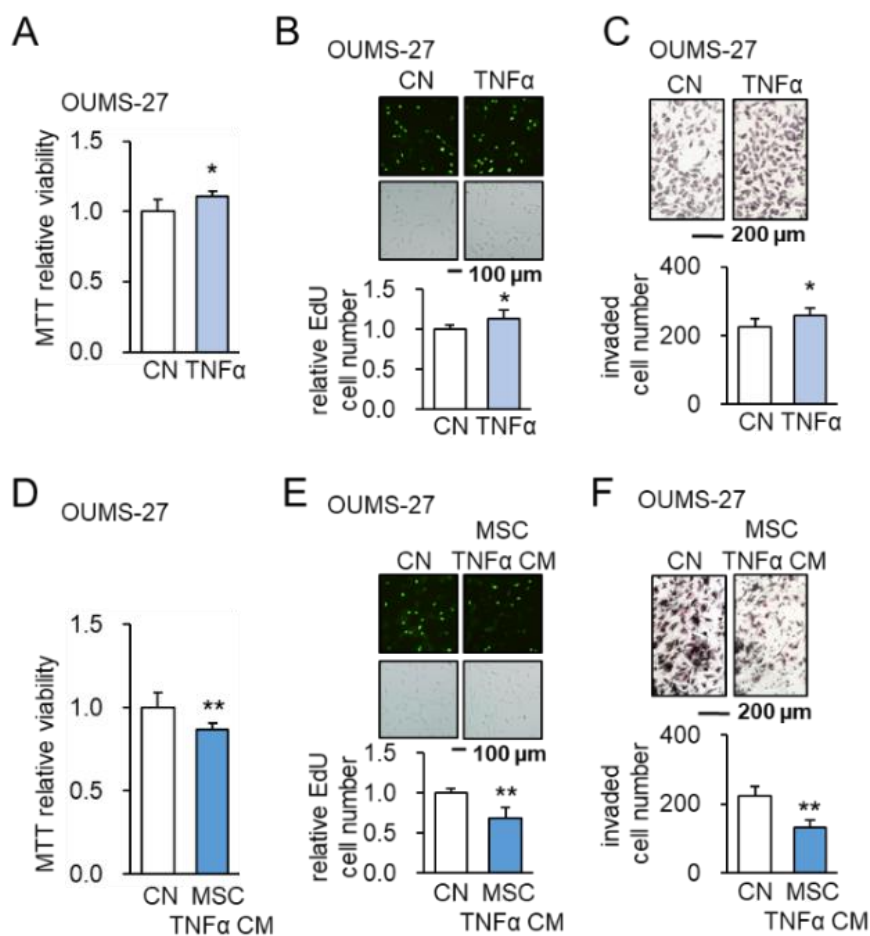

**Figure S2.** Anti-tumorigenic effects of TNF $\alpha$ -treated MSCs-derived CM. CN = control, CM = conditioned medium, and OUMS-27 = OUMS-27 chondrosarcoma cells. The single and double asterisks indicate  $p < 0.05$  and  $0.01$ , respectively. (A–C) Increase in MTT-based viability, EdU-based proliferation, and transwell invasion of OUMS-27 cells by 10  $\mu\text{g/ml}$  of TNF $\alpha$ . (D–F) Reduction in MTT-based viability, EdU-based proliferation, and transwell invasion of OUMS-27 cells by TNF $\alpha$ -treated MSCs-derived CM.

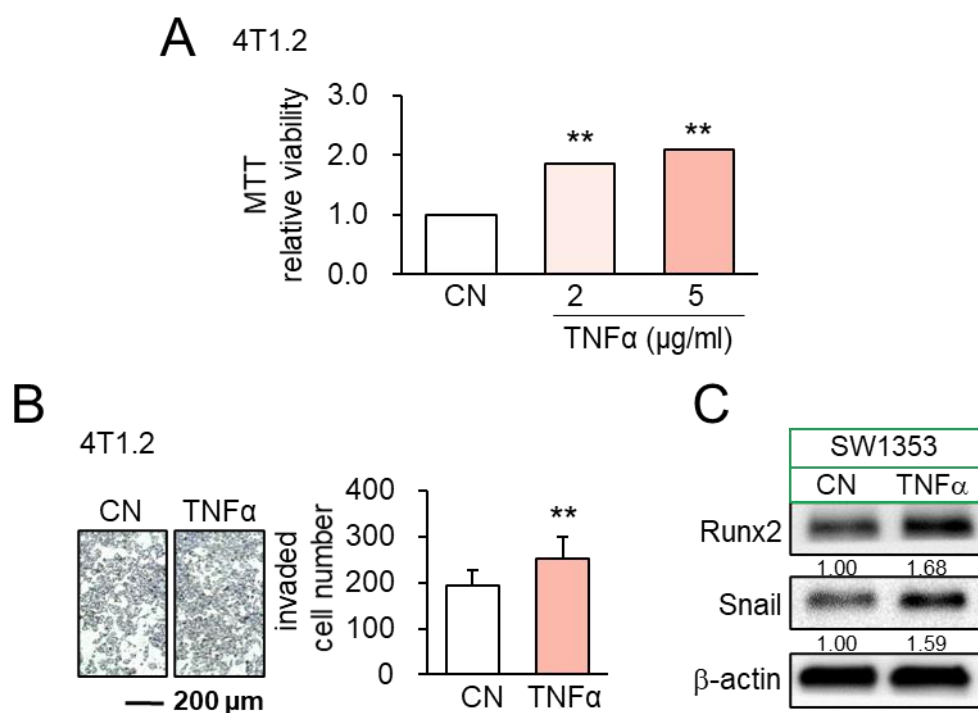

**Figure S3.** The tumor-promoting effect of TNFα cytokine on 4T1.2 mammary tumor cells. **(A,B)** Promotion of MTT-based viability and transwell invasion of 4T1.2 cells in response to 2 and 5 µg/ml of TNFα. **(C)** Upregulation of Runx2 and Snail in SW1353 cells in response to 5 µg/ml of TNFα. Full Western blot images are available in Figure S8.

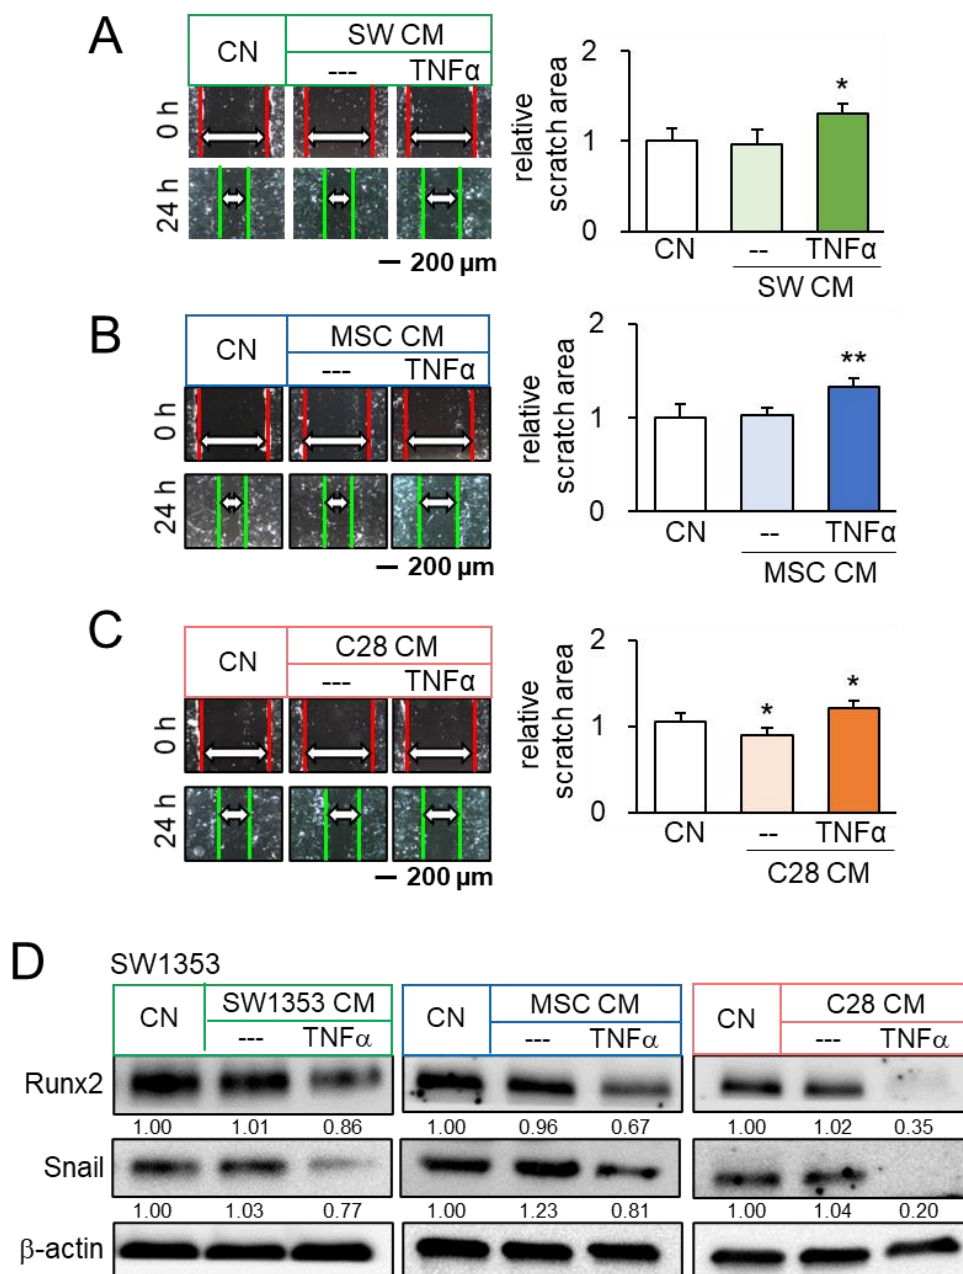

**Figure S4.** Anti-motility effects of TNF $\alpha$ -treated CM. CN = control, CM = conditioned medium, SW = SW1353 chondrosarcoma cells, and C28 = C28/I2 chondrocytes. The single and double asterisks indicate  $p < 0.05$  and  $0.01$ . (A–C) Reduction in scratch-based motility of SW1353 cells by TNF $\alpha$ -treated chondrosarcoma cell, MSC, and C28 chondrocyte-derived CMs, respectively. (D) Downregulation of Runx2 and Snail in SW1353 cells by TNF $\alpha$ -treated chondrosarcoma cell, MSC, and C28 chondrocytes-derived CM, respectively. Full Western blot images are available in Figure S8.

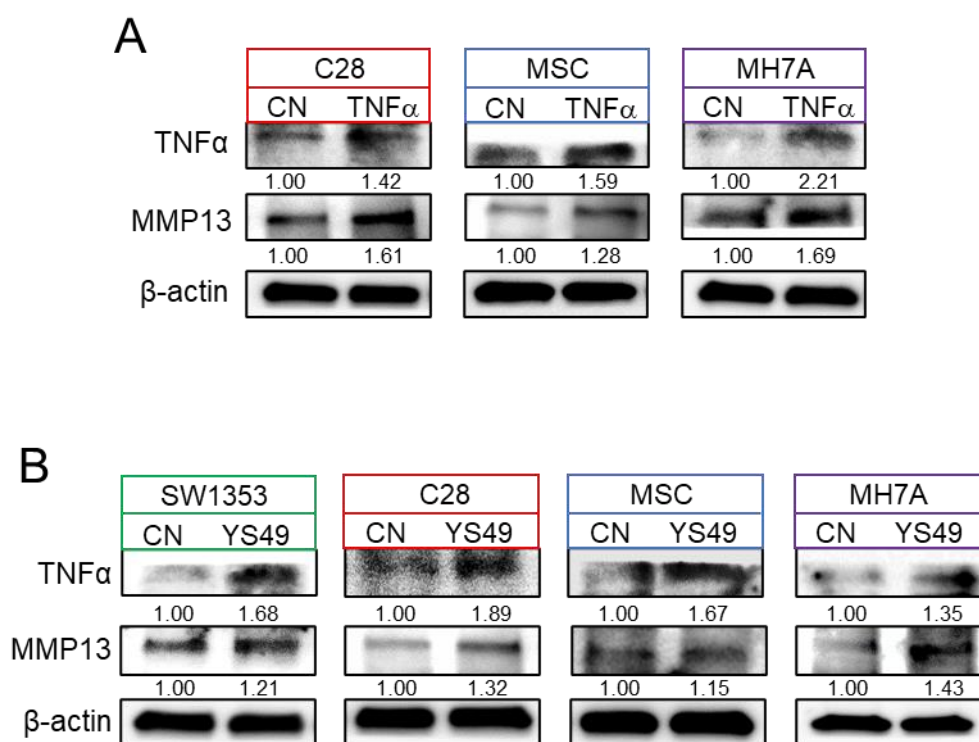

**Figure S5.** Upregulation of TNF $\alpha$  and MMP13 in C28/I2 chondrocytes in response to TNF $\alpha$  and YS49. (A) Upregulation of TNF $\alpha$  and MMP13 of chondrocytes, MSC cells, and MH7a cells in response to 10  $\mu$ g/ml TNF $\alpha$ . (B) Upregulation of TNF $\alpha$  and MMP13 in SW1353 cells, C28 cells, MSC cells, and MH7a cells in response to 50  $\mu$ M of YS49. Full Western blot images are available in Figure S8.

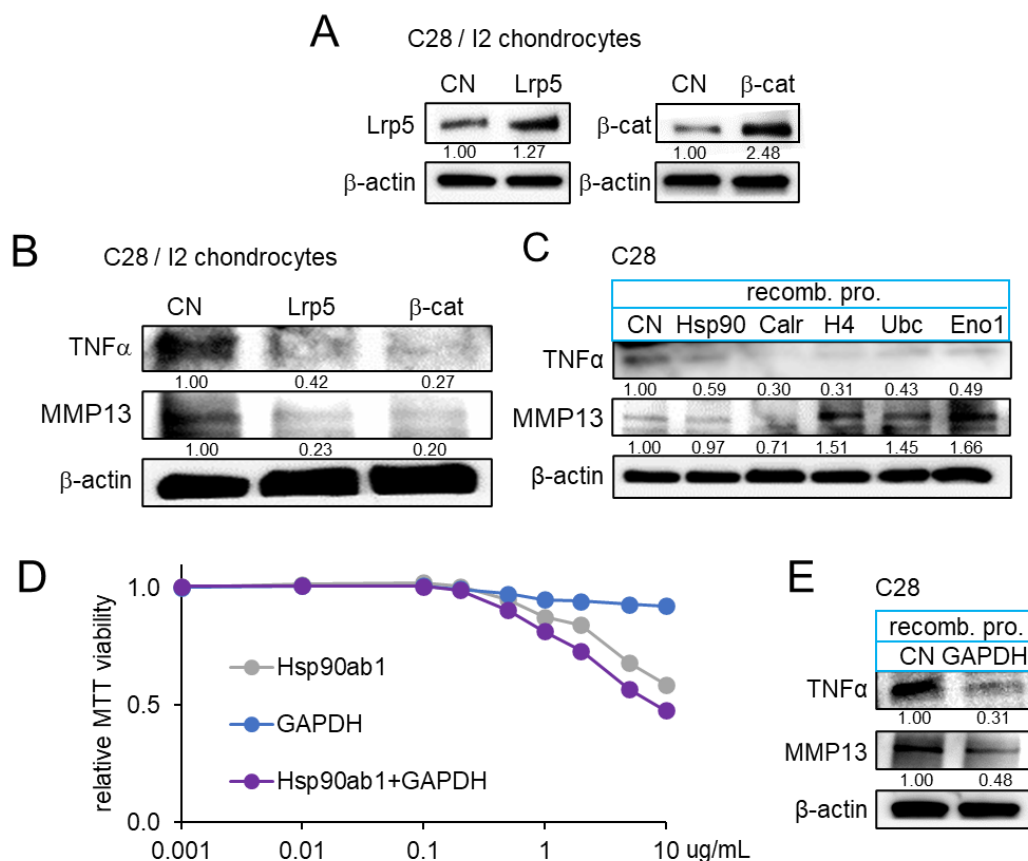

**Figure S6.** Downregulation of TNF $\alpha$  and MMP13 in C28/I2 chondrocytes by Lrp5-overexpressing C28 cell-derived CM, Hsp90ab1 and GAPDH. CN = control, Lrp5 = Lrp5 overexpression, and  $\beta$ -cat =  $\beta$ -catenin overexpression. (A) Overexpression of Lrp5 and  $\beta$ -catenin in C28/I2 chondrocytes. (B) Downregulation of TNF $\alpha$  and MMP13 in response to Lrp5/ $\beta$ -catenin-overexpressing C28 cell-derived CM. (C) Expression of TNF $\alpha$ , MMP13, and FoxO1 in C28/I2 chondrocytes in response to recombinant 1  $\mu$ g/mL of Hsp90ab1 (HSP), 0.8  $\mu$ g/mL of Calreticulin (Calr), 1  $\mu$ g/mL of histone H4 (H4), 0.8  $\mu$ g/mL of polyubiquitin C (Ubc), and 0.8  $\mu$ g/mL of enolase 1 (Eno1). (D) MTT-based dose responses of GAPDH and Hsp90ab1 in SW1353 chondrosarcoma cells. (E) Downregulation of TNF $\alpha$  and MMP13 in C28/I2 chondrocytes in response to recombinant 2  $\mu$ g/mL of GAPDH. Full Western blot images are available in Figure S8.

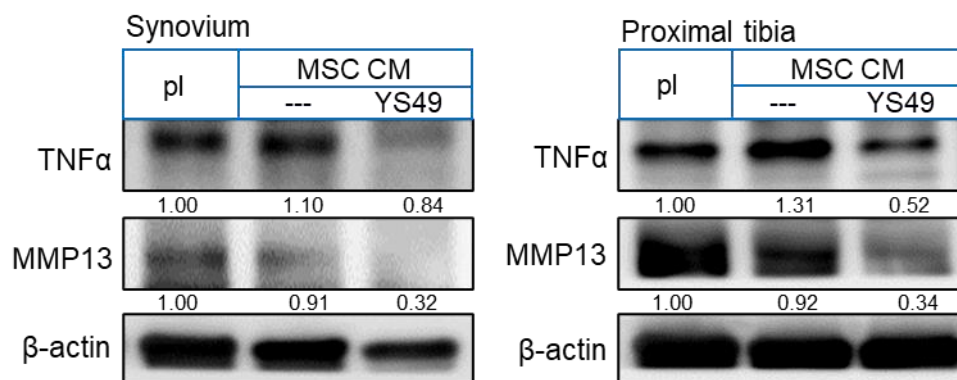

**Figure S7.** Downregulation of TNF $\alpha$ , IL1 $\beta$ , and MMP13 in the synovium and the proximal bone of tumor-inoculated NSG mice in response to YS49 CM. Full Western blot images are available in Figure S8.

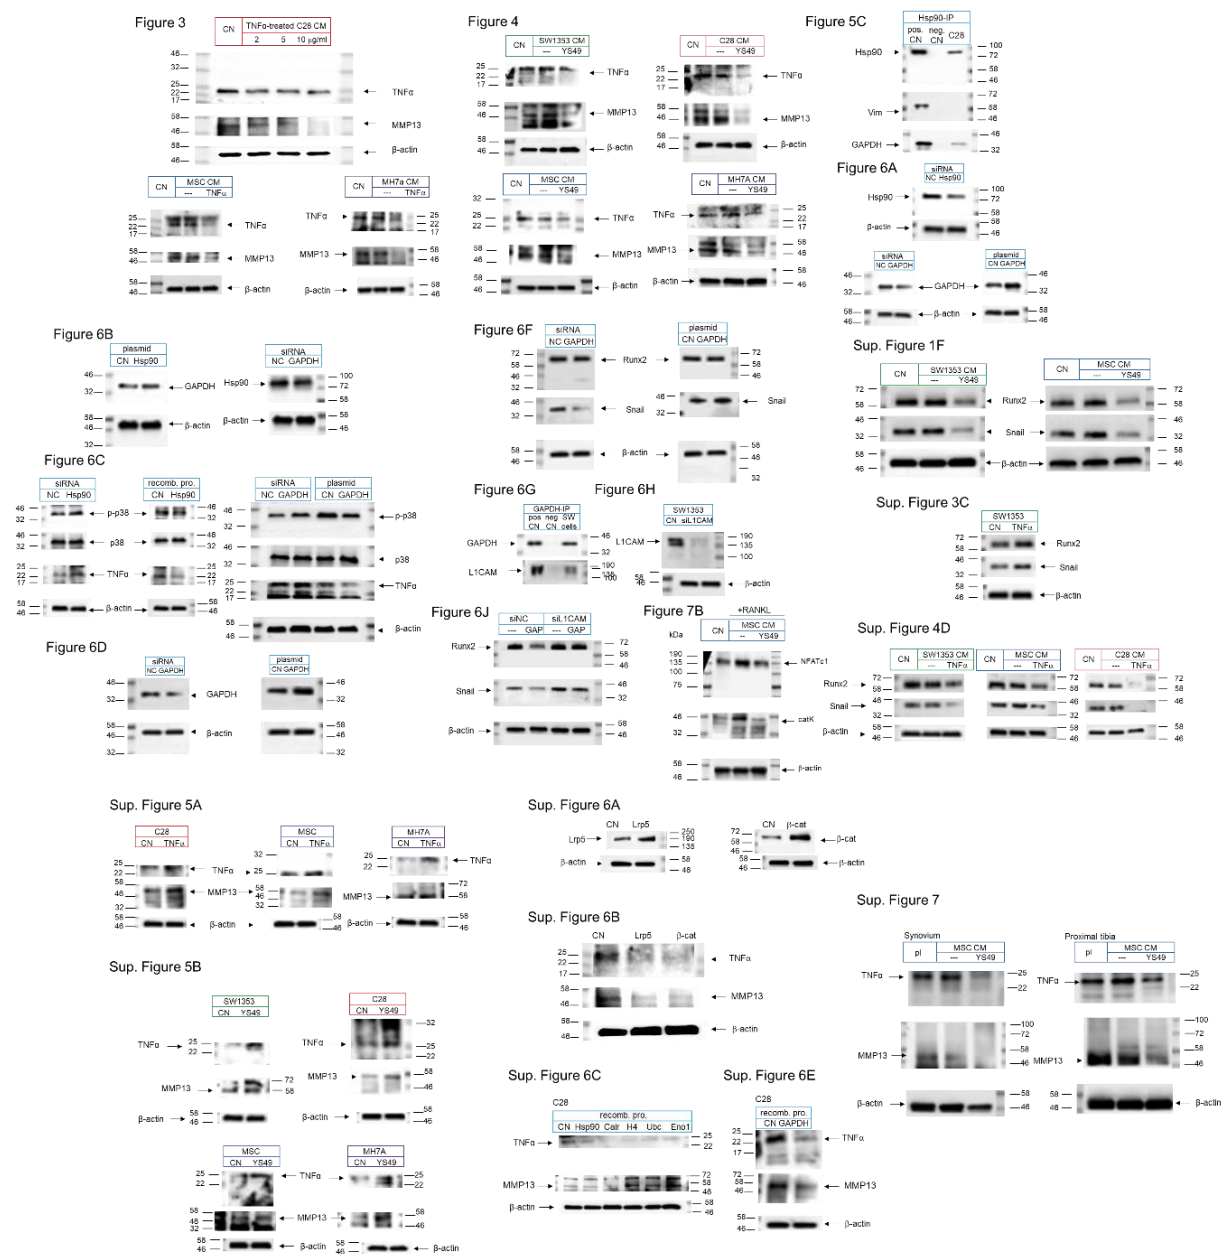

Figure S8. Full Western blot images.

**Table S1.** List of 39 proteins that were immunoprecipitated with Hsp90ab1 in mass spectrometry-based proteomics analysis. The score indicates the MS/MS counts, which represent the relative protein abundance.

| #  | Gene Name        | Score | #  | Gene Name          | Score | #  | Gene Name      | Score |
|----|------------------|-------|----|--------------------|-------|----|----------------|-------|
| 1  | <i>Vim</i>       | 113   | 14 | <i>Serpinh1</i>    | 35    | 27 | <i>Ncl</i>     | 27    |
| 2  | <i>Hspa5</i>     | 80    | 15 | <i>Myh9</i>        | 32    | 28 | <i>Ahnak</i>   | 26    |
| 3  | <i>Stip1</i>     | 80    | 16 | <i>Calr</i>        | 32    | 29 | <i>Ubc</i>     | 26    |
| 4  | <i>Hspa8</i>     | 78    | 17 | <i>Tubb4b</i>      | 30    | 30 | <i>Calu</i>    | 26    |
| 5  | <i>Hspd1</i>     | 70    | 18 | <i>Hnrnpk</i>      | 29    | 31 | <i>Eef2</i>    | 25    |
| 6  | <i>P4hb</i>      | 59    | 19 | <i>Actb; Actg1</i> | 29    | 32 | <i>Hspe1</i>   | 23    |
| 7  | <i>Pdia3</i>     | 57    | 20 | <i>Canx</i>        | 29    | 33 | <i>Rpl4</i>    | 23    |
| 8  | <i>Hspa9</i>     | 50    | 21 | <i>C1qbp</i>       | 29    | 34 | <i>Fkbp4</i>   | 23    |
| 9  | <i>Atp5b</i>     | 47    | 22 | <i>Npm1</i>        | 29    | 35 | <i>Tuba1b</i>  | 22    |
| 10 | <i>Gapdh</i>     | 44    | 23 | <i>Hap90aa1</i>    | 29    | 36 | <i>Hnrnpa1</i> | 21    |
| 11 | <i>Atp5a1</i>    | 41    | 24 | <i>Hnrnpa3</i>     | 28    | 37 | <i>Pabpc1</i>  | 21    |
| 12 | <i>Hnrnpa2b1</i> | 39    | 25 | <i>Mybbp1a</i>     | 28    | 38 | <i>Anxa2</i>   | 20    |
| 13 | <i>Hsp90b1</i>   | 37    | 26 | <i>Eef1a1</i>      | 27    | 39 | <i>Khsrp</i>   | 20    |
